# Supplementary material for: Strong enhancements of nucleation and spherulitic growth rates through amplified interfacial effects for immiscible linear polymer/comb-like copolymer double-layer films
Source: Royal Society of Chemistry journal article supplement (doi:10.1039/c4ra02167c), 2014-01-01
Supplement: c4ra02167c1.pdf [file c4ra02167c1.pdf]

Supplementary Information for

**Strong enhancements of nucleation and spherulitic growth rates  
through amplified interfacial effects for immiscible linear polymer/comb-  
like copolymer double-layer films†**

Yaqiong Zhang,<sup>a</sup> Zhaohua Xu,<sup>b</sup> Zhongkai Wang,<sup>a</sup> Yunsheng Ding,<sup>c</sup>  
and Zhigang Wang<sup>\*a</sup>

<sup>a</sup>CAS Key Laboratory of Soft Matter Chemistry, Department of Polymer Science and Engineering, Hefei National Laboratory for Physical Sciences at the Microscale, University of Science and Technology of China, Hefei, Anhui Province 230026, China. E-mail: zgwang2@ustc.edu.cn; Tel.: +86 0551-63607703; Fax: +86 0551-63607703.

<sup>b</sup>Department of Material Technology, Jiangmen Polytechnic, Jiangmen, Guangdong Province 529090, China

<sup>c</sup>Institute of Polymer Materials & Chemical Engineering, School of Chemical Engineering, Hefei University of Technology, Hefei, Anhui Province 230009, China

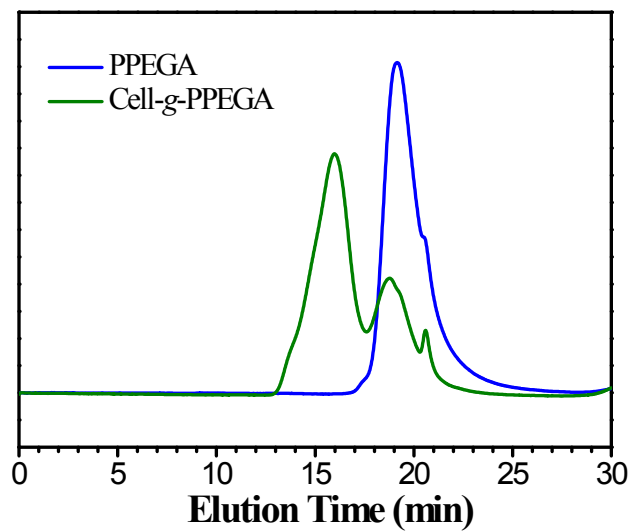

**Fig. S1** GPC traces of PPEGA and Cell-g-PPEGA copolymers.

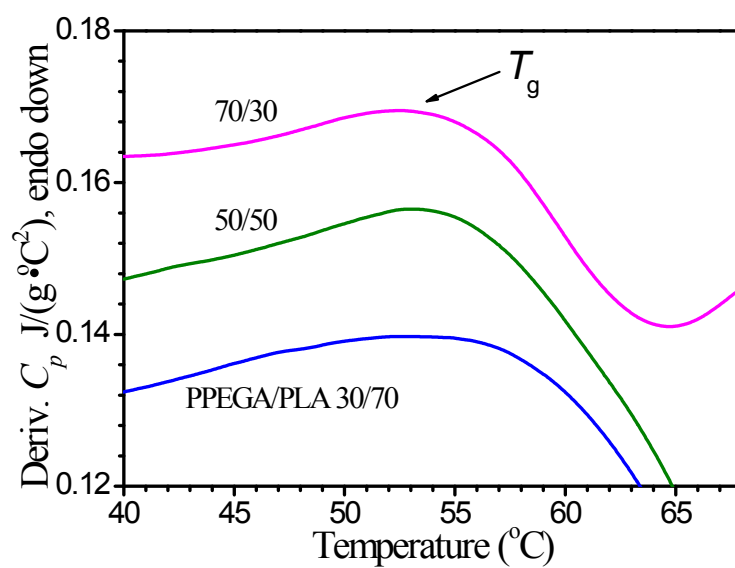

**Fig. S2** Temperature derivative heat capacity ( $C_p$ ) curves for PPEGA/PLA blends with PPEGA compositions of 30, 50, and 70 wt%. Vertical shifts of the curves have been applied for clarity.

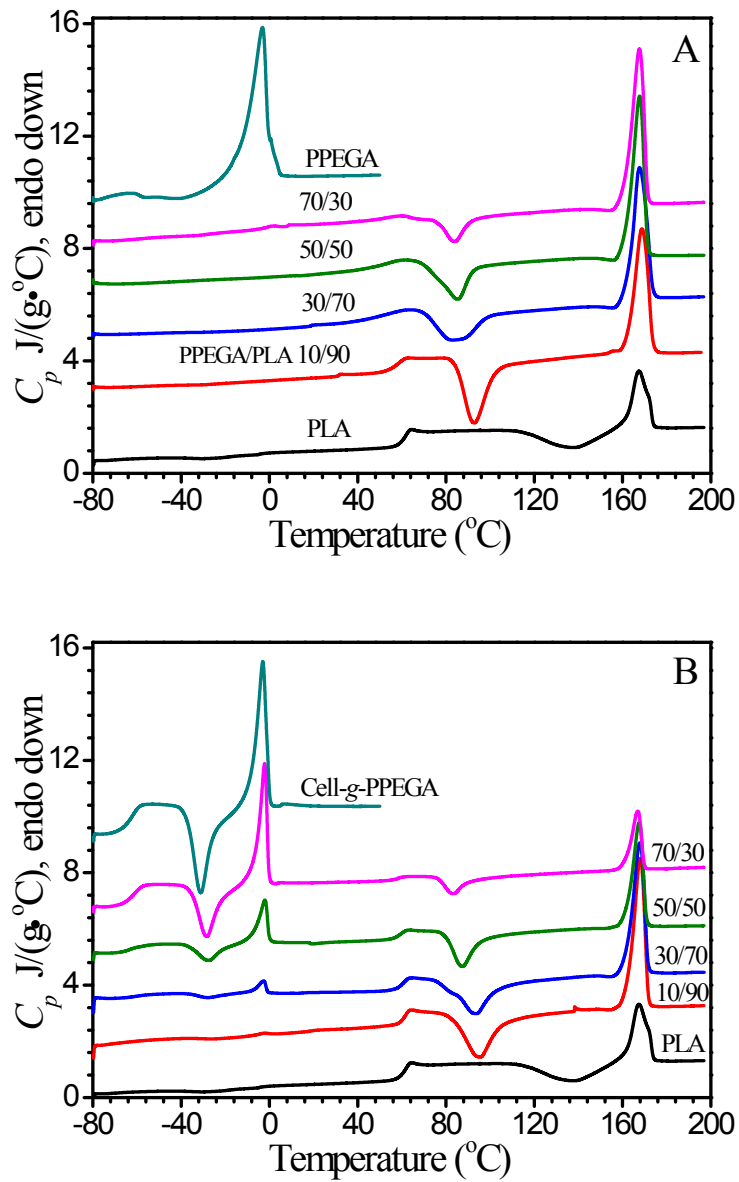

**Fig. S3** Heat capacity ( $C_p$ ) curves for (A) PEGEA/PLA blends and (B) Cell-g-PEGEA/PLA blends with PEGEA or Cell-g-PEGEA compositions of 0, 10, 30, 50, 70, and 100 wt%.

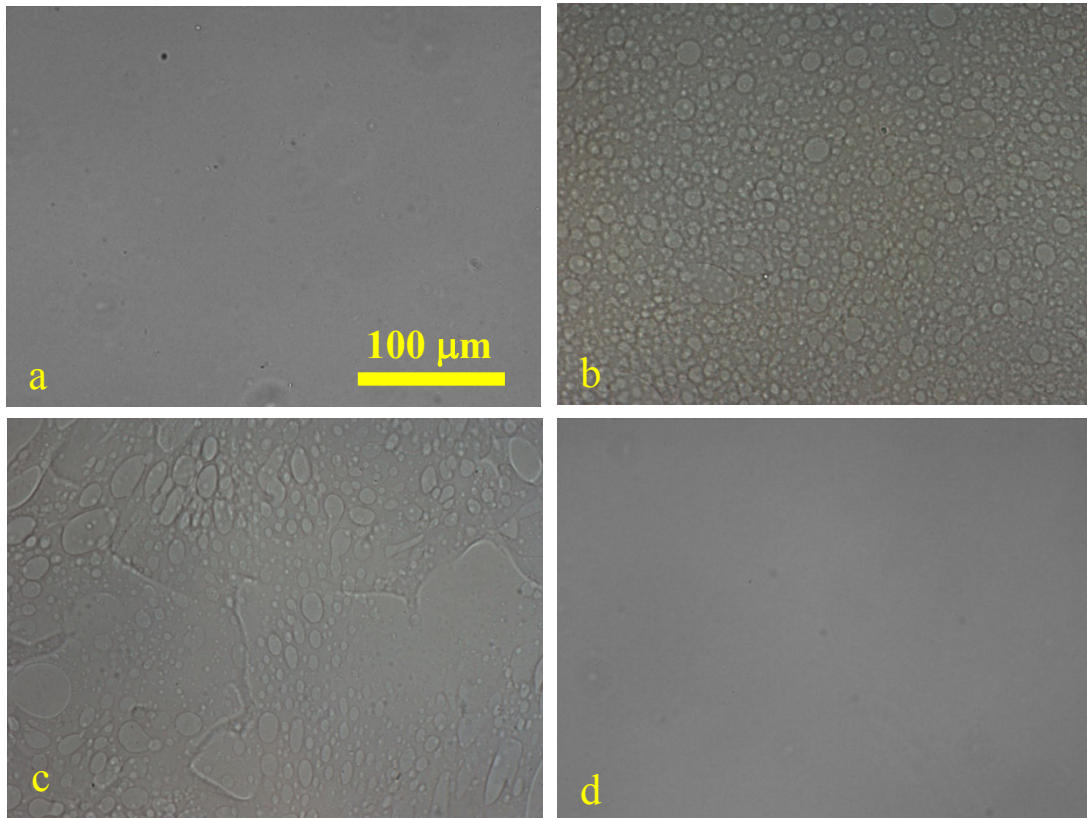

**Fig. S4** Phase contrast optical micrographs observed at 200 °C for PPEGA/PLA blends with PPEGA compositions of (a) 10 wt%; (b) 50 wt%; (c) 70 wt% and (d) 100 wt%. The scale bar in (a) represents 100  $\mu\text{m}$  and is applied to all other micrographs.

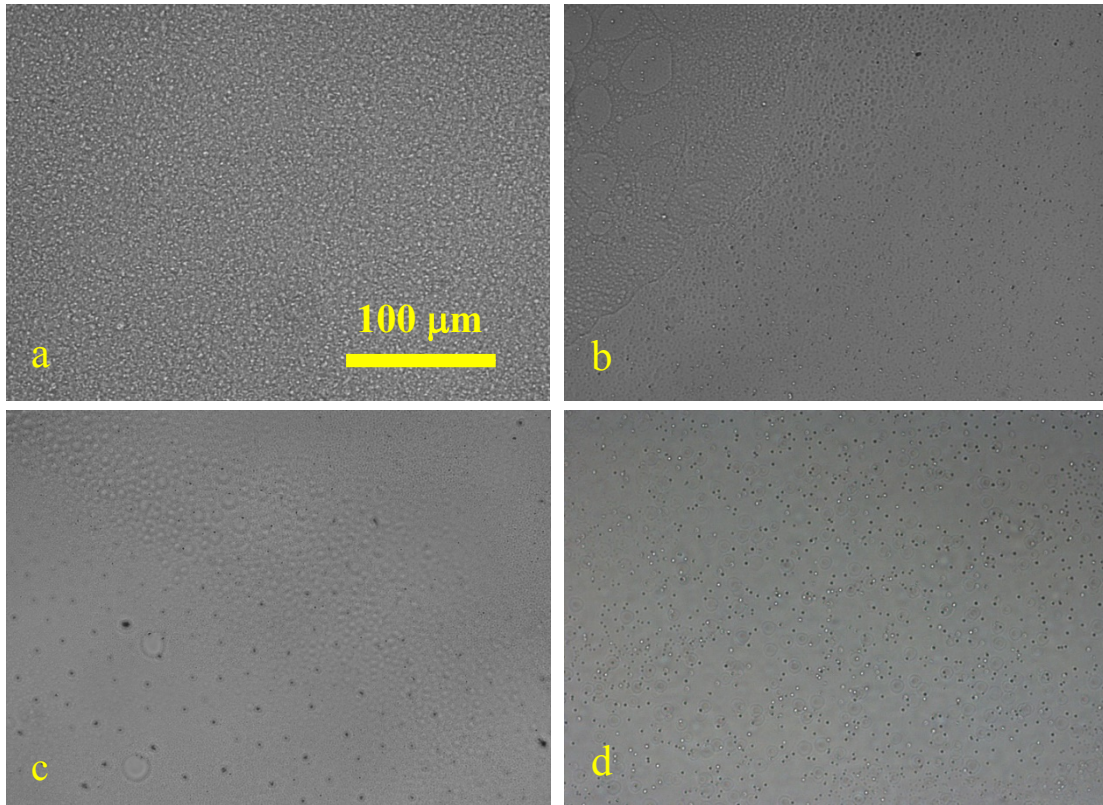

**Fig. S5** Phase contrast optical micrographs observed at 200 °C for Cell-g-PPEGA/PLA blends with Cell-g-PPEGA compositions of (a) 10 wt%; (b) 50 wt%; (c) 70 wt% and (d) 100 wt%. The scale bar in (a) represents 100  $\mu\text{m}$  and is applied to all other micrographs.

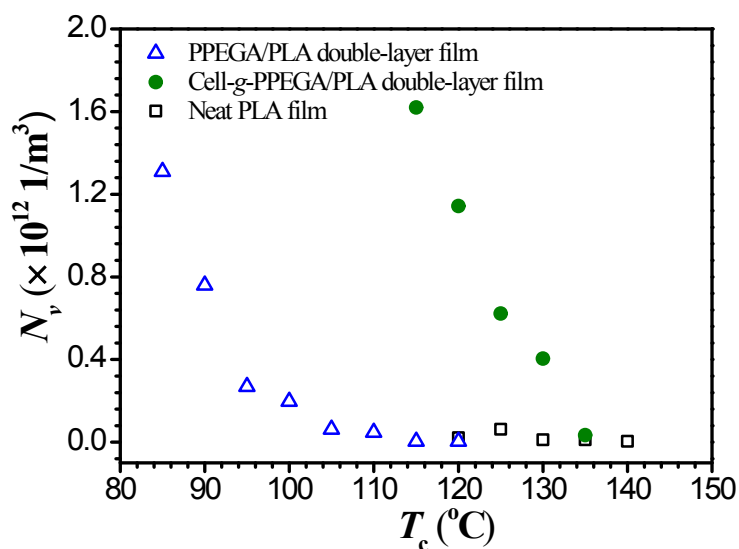

**Fig. S6** Changes in nucleation density,  $N_v$ , as functions of  $T_c$  for neat PLA and Cell-g-PPEGA/PLA and PPEGA/PLA double-layer films.

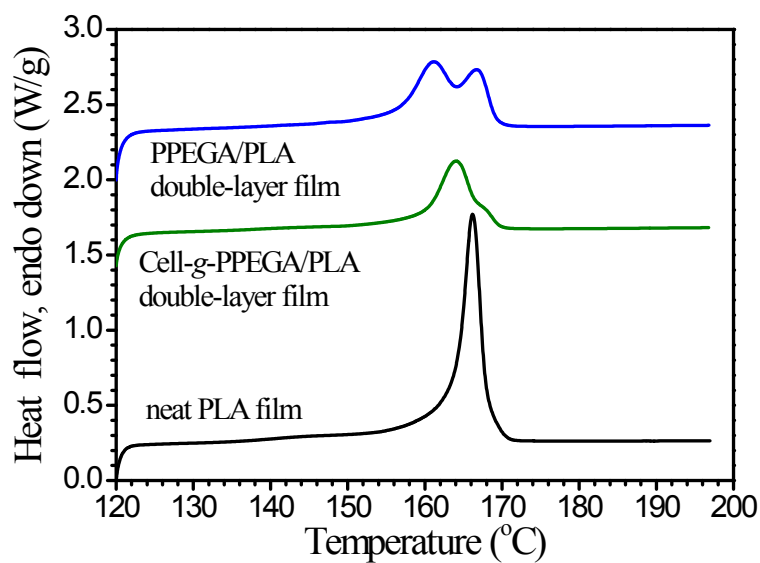

**Fig. S7** DSC heat flow curves for neat PLA and Cell-g-PPEGA/PLA and PPEGA/PLA double-layer films during heating scan from 120 to 200  $^{\circ}\text{C}$  after the film samples isothermally crystallize at 120  $^{\circ}\text{C}$  for 60 min. The heating rate is 10  $^{\circ}\text{C}/\text{min}$ . The curves are shifted for clarity.

**Table S1.** Mass Fraction, Enthalpy of Fusion and Crystallinity Values for Neat PLA and Cell-g-PPEGA/PLA and PPEGA/PLA Double-layer Films during the Heating Scan from 120 to 200 °C after Isothermal Crystallization at 120 °C for 60 min.

| Sample code      | w <sub>PLA</sub> <sup>a</sup> | $\Delta H_m$ (J/g) <sup>b</sup> | $\Delta H_m'$ (J/g) <sup>c</sup> | X <sub>c</sub> (%) <sup>d</sup> |
|------------------|-------------------------------|---------------------------------|----------------------------------|---------------------------------|
| PLA              | 100%                          | 35.2                            | 35.2                             | 37.6                            |
| Cell-g-PPEGA/PLA | 50.4%                         | 19.3                            | 38.3                             | 40.9                            |
| PPEGA/PLA        | 51.7%                         | 27.2                            | 52.6                             | 56.2                            |

<sup>a</sup>Mass fraction of PLA in the sample; <sup>b</sup>Enthalpy of fusion obtained from the heat flow curves from DSC measurements; <sup>c</sup>Normalized enthalpy of fusion,  $\Delta H_m' = \Delta H_m / w_{PLA}$ ;

<sup>d</sup>Normalized crystallinity,  $X_c = \Delta H_m' / 93.6 \times 100$  %. The enthalpy of fusion for 100 % crystalline PLA is 93.6 J/g.
